# Supplementary material for: CVD synthesis of Mo(1−x)WxS2and MoS2(1−x)Se2xalloy monolayers aimed at tuning the bandgap of molybdenum disulfide
Source: Royal Society of Chemistry journal article supplement (doi:10.1039/c5nr02515j), 2015-01-01
Supplement: c5nr02515j1.pdf [file c5nr02515j1.pdf]

## Supporting Information

### CVD Synthesis of $\text{Mo}_{(1-x)}\text{W}_x\text{S}_2$ and $\text{MoS}_{2(1-x)}\text{Se}_{2x}$ Alloy Monolayers

#### Aimed at Tuning the Bandgap of Molybdenum Disulfide

Wenting Zhang,<sup>a</sup> Xiaodong Li,<sup>a</sup> Tongtong Jiang,<sup>a</sup> Jiangluqi Song,<sup>a</sup> Yue Lin,<sup>b</sup>

LixinZhu<sup>\*c</sup> and Xiaoliang Xu<sup>\*a</sup>

<sup>a</sup> Key Laboratory of Strongly-Coupled Quantum Matter Physics, Chinese Academy of Sciences, School of Physical Sciences, University of Science and Technology of China, Hefei, Anhui, 230026, P. R. China. Email: xlxu@ustc.edu.cn.

<sup>b</sup> Hefei National Laboratory for Physical Sciences at the Microscale, University of Science and Technology of China, Hefei, Anhui, 230026, P. R. China.

<sup>c</sup> Center Laboratory, First Affiliated Hospital of Anhui Medical University, Hefei, Anhui, 230026, P. R. China. E-mail: lx-zhu@163.com.

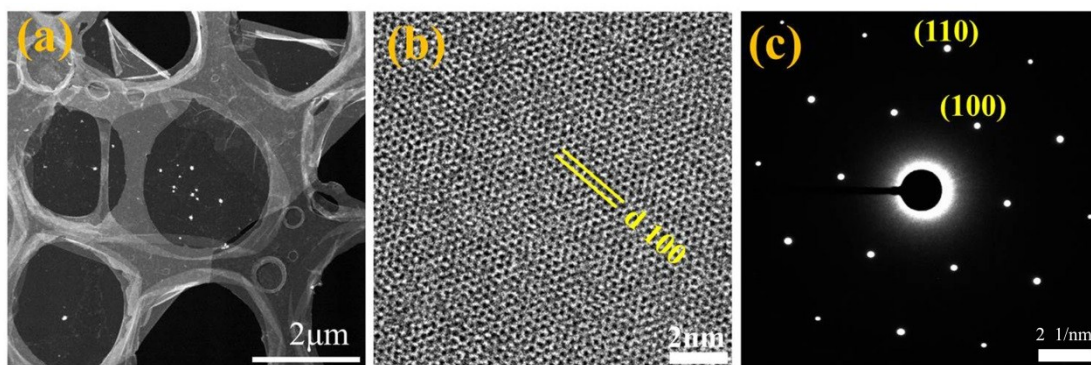

Fig. S1 (a) The dark-field TEM image of a ML- $\text{Mo}_{(1-x)}\text{W}_x\text{S}_2$  nanosheet supported on holey carbon grid. The folds and black dots were produced during the transfer onto the grid. (b) HRTEM image taken from (a) and its SAED pattern (c) which demonstrates it is a single crystal with hexagonal structure.

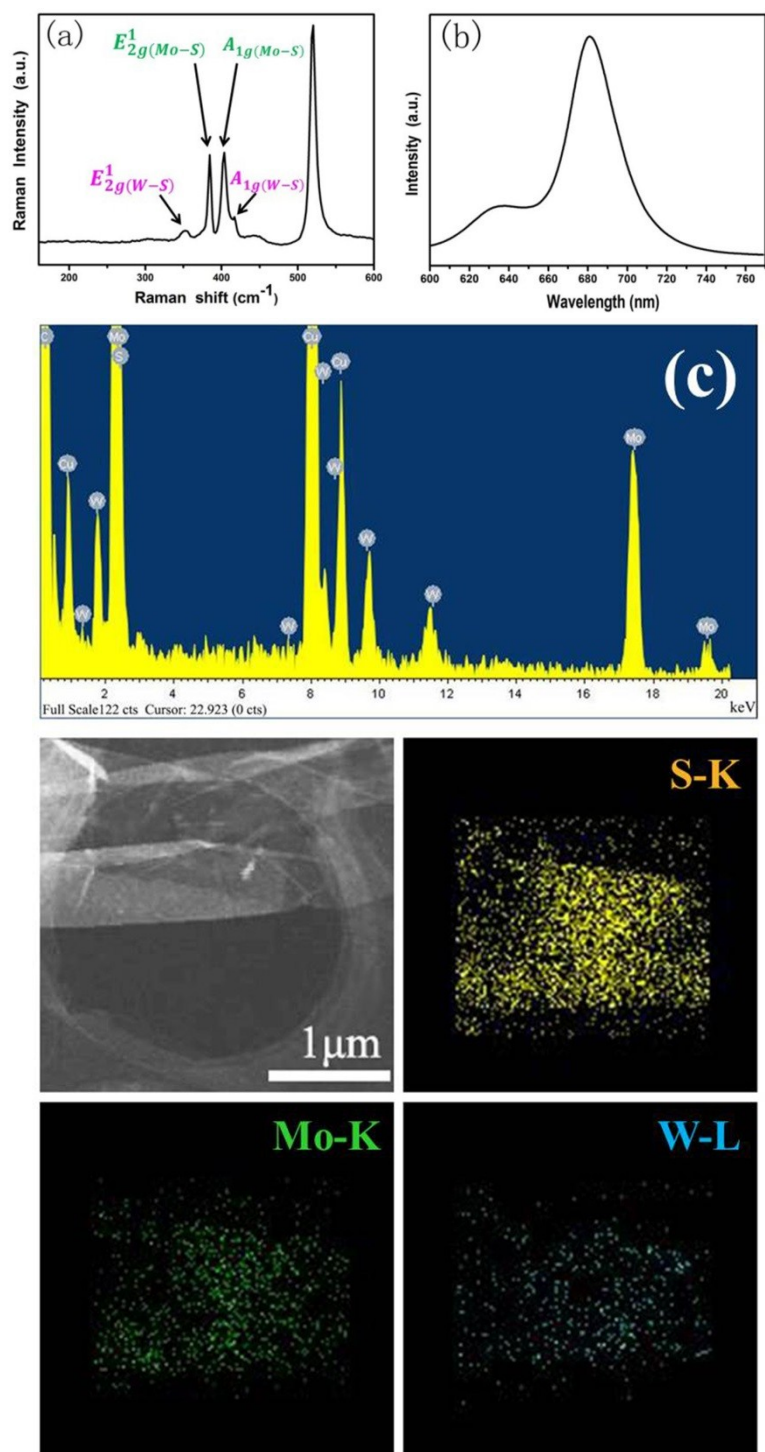

Fig. S2 (a)-(b) Raman and PL spectrum of the representative sample ML-Mo<sub>(1-x)</sub>W<sub>x</sub>S<sub>2</sub> respectively. (c) EDS characterization of ML-Mo<sub>(1-x)</sub>W<sub>x</sub>S<sub>2</sub>, TEM image of a nanosheet transferred to a grid and the corresponding 2D elemental mapping for the three detected elements: Mo, S, and W, respectively.

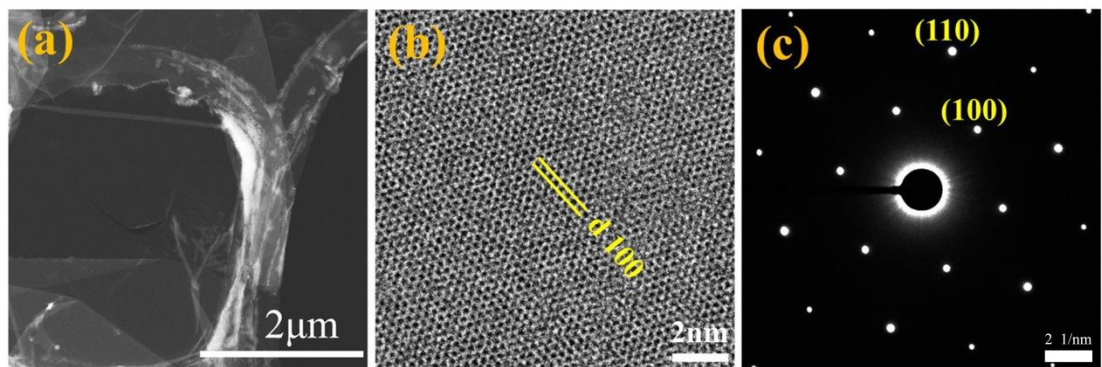

Fig. S3 (a) The dark-field TEM image of a ML-MoS<sub>2(1-x)</sub>Se<sub>2x</sub> nanosheet supported on holey carbon grid. The folds were produced during the transfer onto the grid. (b) HRTEM image taken from (a), the lattice fringe measured from it is 0.28 nm, corresponding to the (100) lattice plane. (c) The corresponding SAED pattern which showing only one set of six-fold symmetry diffraction spots, demonstrates it is a single crystal with hexagonal structure.

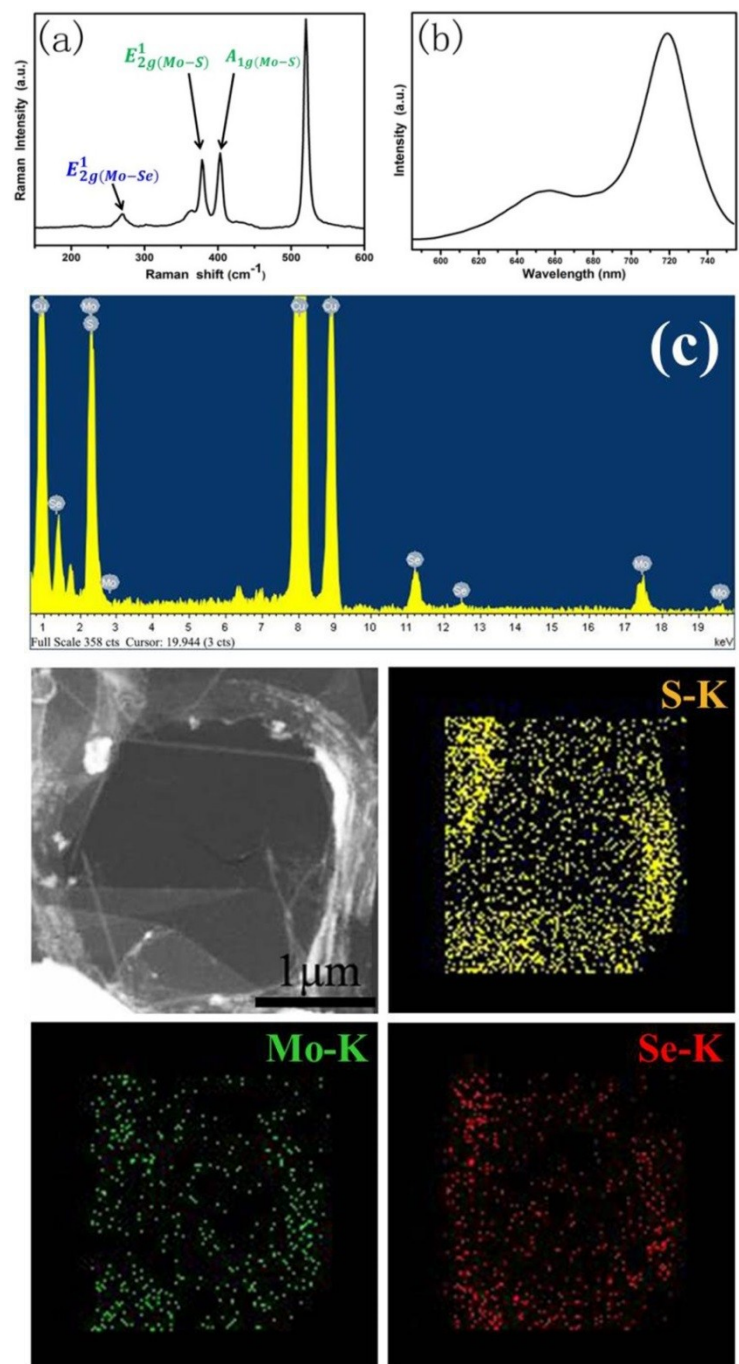

Fig. S4 (a)-(b) Raman and PL spectrum of the representative sample ML- $\text{MoS}_{2(1-x)}\text{Se}_{2x}$  respectively. (c) EDS characterization of ML- $\text{MoS}_{2(1-x)}\text{Se}_{2x}$ , TEM image of a nanosheet transferred to a grid and the corresponding 2D elemental mapping for the three detected elements: Mo, S, and Se, respectively. The data shows that the Se mole fraction  $[x, \text{Se}/(\text{Se}+\text{S})]$  of  $\sim 0.2$ , indicating the composition of the nanosheet as  $\text{MoS}_{2(0.8)}\text{Se}_{2(0.2)}$ .

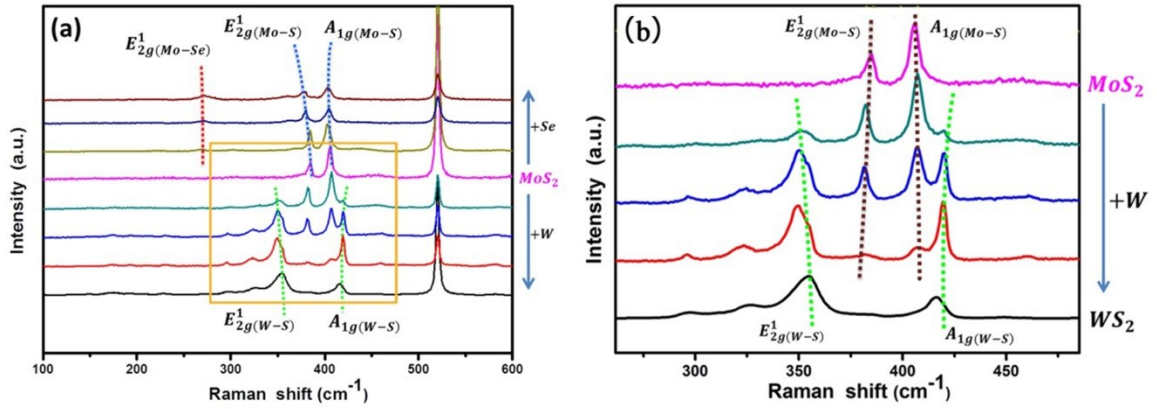

Fig. S5 (a) Raman spectrum of the ML-Mo<sub>(1-x)</sub>W<sub>x</sub>S<sub>2</sub> and ML-MoS<sub>2(1-x)</sub>Se<sub>2x</sub> nanosheets excited with a 532 nm argon ion laser (Fig.3 (a) in paper). Part of the spectra indicated by an orange rectangle in (a) is shown in larger scale in (b).

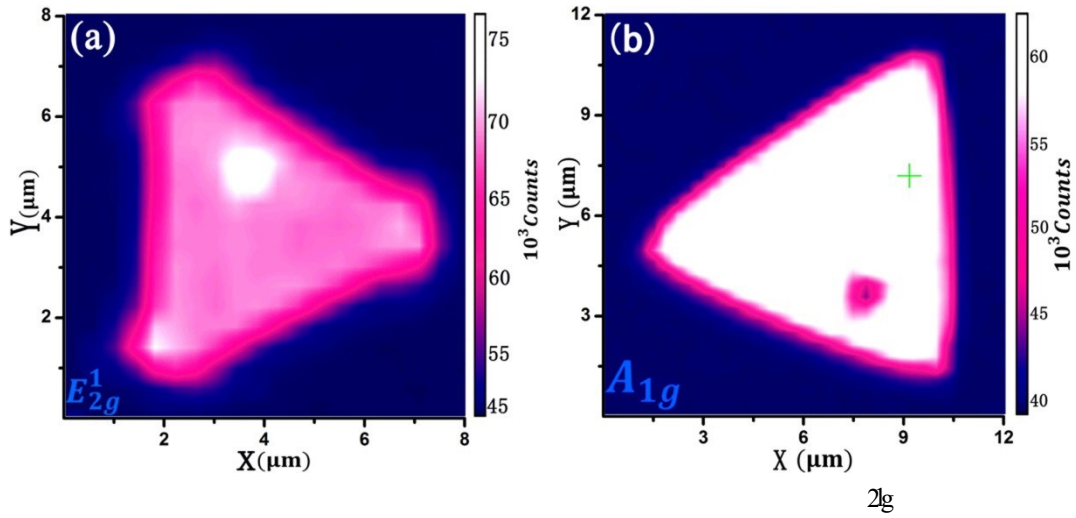

Fig. S6 Raman peak intensity mapping at the MoS<sub>2</sub>-like E<sub>2g</sub><sup>1</sup> for ML-Mo<sub>(1-x)</sub>W<sub>x</sub>S<sub>2</sub> (a) and MoS<sub>2</sub>-like A<sub>1g</sub> for ML-MoS<sub>2(1-x)</sub>Se<sub>2x</sub> (b) respectively.
